# Supplementary material for: Rich essential properties of silicon-substituted graphene nanoribbons: a comprehensive computational study
Source: Royal Society of Chemistry journal article supplement (doi:10.1039/d4cp00290c), 2024-01-01
Supplement: d4cp00290c1.pdf [file d4cp00290c1.pdf]

## Rich essential properties of silicon-substituted graphene nanoribbons: A comprehensive computational study

D.M.Hoat<sup>1,2</sup>, Vo Khuong Dien<sup>3,4</sup>, Quoc Duy Ho<sup>5</sup>, Dang Phuc Dam<sup>6</sup>, Nguyen Thanh Tien<sup>6</sup>, and Duy Khanh Nguyen<sup>7,8,\*</sup>

<sup>1</sup>*Institute of Theoretical and Applied Research, Duy Tan University, Ha Noi 100000, Viet Nam*

<sup>2</sup>*Faculty of Natural Sciences, Duy Tan University, Da Nang 550000, Viet Nam*

<sup>3</sup>*Division of Applied Physics, Dong Nai Technology University, Bien Hoa City, Vietnam; Email: vokhuongdien@dntu.edu.vn*

<sup>4</sup>*Faculty of Engineering, Dong Nai Technology University, Bien Hoa City, Vietnam*

<sup>5</sup>*Department of Mathematics and Physics, Universitetet i Stavanger, Stavanger, Norway*

<sup>6</sup>*Department of Physics, College of Natural Sciences, Can Tho University, Can Tho City 900000, Vietnam*

<sup>7</sup>*Laboratory for Computational Physics, Institute for Computational Science and Artificial Intelligence, Van Lang University, Ho Chi Minh City, Vietnam*

<sup>8</sup>*Faculty of Mechanical - Electrical and Computer Engineering, School of Technology, Van Lang University, Ho Chi Minh City, Vietnam*

\*Corresponding author at: Van Lang University, Ho Chi Minh City, Vietnam; Email: khanh.nguyenduy@vlu.edu.vn

Table S1: bandgap (eV), magnetic moment ( $\mu_B$ ), and magnetism of the 6AGNR configurations

| GNR   | Configuration         | Bandgap $E_g$ (eV) | Magnetic moment ( $\mu_B$ ) | Magnetism                 |
|-------|-----------------------|--------------------|-----------------------------|---------------------------|
| 6AGNR | Pristine N6           | PBE: 0.91          | 0                           | nonmagnetic semiconductor |
|       | (1Si) <sub>edge</sub> | PBE: 0.84          | 0                           | nonmagnetic semiconductor |
|       | (2Si) <sub>meta</sub> | PBE: 1.16          | 0                           | nonmagnetic semiconductor |
|       | (2Si) <sub>para</sub> | PBE: 0.22          | 0                           | nonmagnetic semiconductor |
|       | (6Si)/100% Si         | PBE: 2.36          | 0                           | nonmagnetic semiconductor |

Table S2: bandgap (eV), magnetic moment ( $\mu_B$ ), and magnetism of the 8AGNR configurations

| GNR   | Configuration         | Bandgap $E_g$ (eV) | Magnetic moment ( $\mu_B$ ) | Magnetism                 |
|-------|-----------------------|--------------------|-----------------------------|---------------------------|
| 8AGNR | Pristine N8           | PBE: 0.43          | 0                           | nonmagnetic semiconductor |
|       | (1Si) <sub>edge</sub> | PBE: 0.41          | 0                           | nonmagnetic semiconductor |
|       | (2Si) <sub>meta</sub> | PBE: 0.52          | 0                           | nonmagnetic semiconductor |
|       | (2Si) <sub>para</sub> | PBE: 0.54          | 0                           | nonmagnetic semiconductor |
|       | (8Si)/100% Si         | PBE: 2.28          | 0                           | nonmagnetic semiconductor |

Table S3: bandgap (eV), magnetic moment ( $\mu_B$ ), and magnetism of the pristine and single Si-substituted 7AGNRs under (2x1x1) supercells

| Configuration                               | Bandgap $E_g$ (eV) | Magnetic moment ( $\mu_B$ ) | Magnetism                 |
|---------------------------------------------|--------------------|-----------------------------|---------------------------|
| Pristine 7AGNR supercell                    | PBE: 1.57          | 0                           | nonmagnetic semiconductor |
| (1Si) <sub>edge</sub> (2x1x1) supercell     | PBE: 1.46          | 0                           | nonmagnetic semiconductor |
| (1Si) <sub>non-edge</sub> (2x1x1) supercell | PBE: 1.27          | 0                           | nonmagnetic semiconductor |

Table S4: Magnetic energies of the pristine 6ZGNR configuration (configuration 1), including the antiferromagnetic (AFM), ferromagnetic (FM), and nonmagnetic (NM).

| Configuration 1 | AFM      | FM       | NM       |
|-----------------|----------|----------|----------|
| Energy          | -117.050 | -117.039 | -116.981 |

Table S5: Magnetic energies of the (1Si)<sub>edge</sub>-substituted 6ZGNR configuration (configuration 2), including the antiferromagnetic (AFM), ferromagnetic (FM), and nonmagnetic (NM).

| Configuration 2 | AFM      | FM       | NM       |
|-----------------|----------|----------|----------|
| Energy          | -110.039 | -110.054 | -110.019 |

Table S6: Magnetic energies of the (1Si)<sub>non-edge</sub>-substituted 6ZGNR configuration (configuration 3), including the antiferromagnetic (AFM), ferromagnetic (FM), and nonmagnetic (NM).

| Configuration 3 | AFM      | FM       | NM       |
|-----------------|----------|----------|----------|
| Energy          | -110.080 | -110.089 | -110.046 |

Table S7: Magnetic energies of the (6Si)-substituted 6ZGNR configuration (configuration 4)

| Configuration 4 | AFM     | FM      | NM      |
|-----------------|---------|---------|---------|
| energy          | -90.140 | -90.148 | -90.118 |

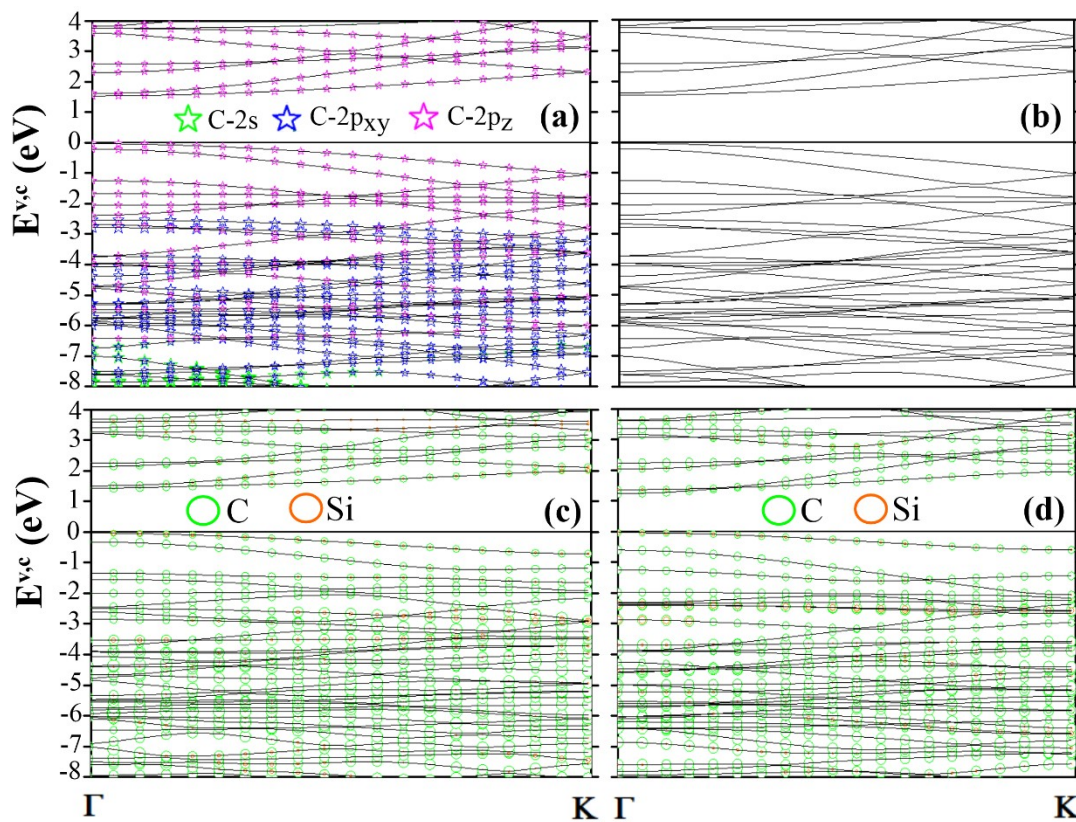

Figure S1: (a) orbital-projected and (b) total band structures of 7AGNRs under (2x1x1) supercell; atom-dominated band structures of (c) single Si edge- and (d) single Si non-edge-substituted AGNRs under (2x1x1) supercell. The green, blue, and magenta stars are responsible for the C-2s, C-2p<sub>xy</sub>, and C-2p<sub>z</sub> orbitals, while the green and orange circles display the carbon and silicon dominations, respectively.

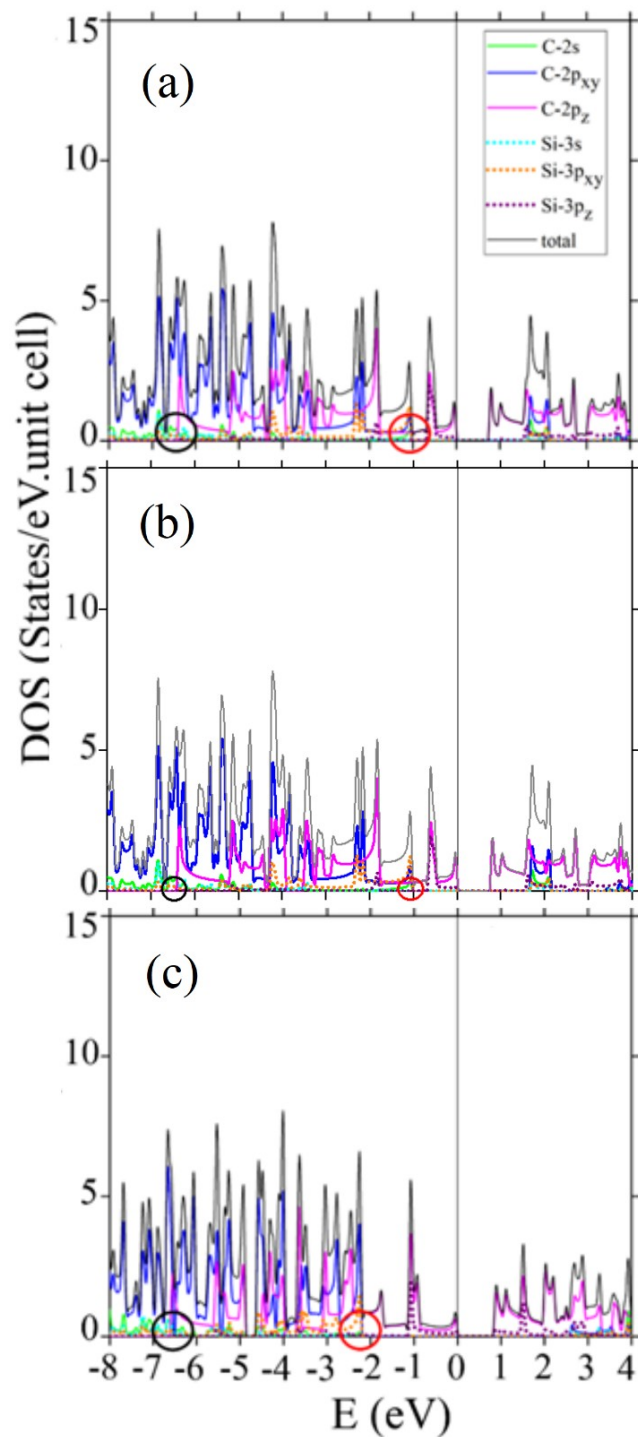

Figure S2: Orbital-projected density of states of (a) single Si non-edge- (b) double Si ortho-, and (c) double Si para-substituted 7AGNR configurations, in which the black and red circles display the termination of C-2p<sub>z</sub> and C-2p<sub>xy</sub> orbitals, respectively.
